# Supplementary material for: Tomato Yellow Leaf Curl Sardinia Virus, a Begomovirus Species Evolving by Mutation and Recombination: A Challenge for Virus Control
Source: MDPI journal article supplement (doi:10.3390/v11010045), 2019-01-09
Supplement: s1 [file s1]

**Supplementary Material Table S1.** Recombination event detected in tomato yellow leaf curl Sardinia virus (TYLCSV) strain Sar/Group 1 isolates exemplified for isolate [IT-Sar-88] involving a major parent from strain Sar/Group 2 (exemplified with isolate [IT-Sic-91] and a minor parent from the begomovirus South African cassava mosaic virus (SACMV) (isolate [MG-MG718A2-11]) (the Gen Bank accession numbers of the nucleotide sequences are shown between brackets).

| Recombinant Sequence           | Major Parent                   | Minor Parent                        | Breakpoints <sup>a</sup> |      | Methods <sup>b</sup> | p-Value <sup>c</sup>      |
|--------------------------------|--------------------------------|-------------------------------------|--------------------------|------|----------------------|---------------------------|
|                                |                                |                                     | Begin                    | End  |                      |                           |
| TYLCSV-[IT-Sar-88]<br>(X61153) | TYLCSV-[IT-Sic-91]<br>(Z28390) | SACMV-[MG-MG718A2-11]<br>(KL888094) | 2416                     | 2744 | RGBMCT               | 4,777 x 10 <sup>-11</sup> |

<sup>a</sup> Positions in the recombinant sequence; <sup>b</sup> methods of RDP4 program (Martin et al., 2015) with acceptable p-Value. R = RDP, G = GENECONV, B = BootScan, M = MaxChi, C = Chimaera, T = 3Seq; <sup>c</sup> the reported p-value is the highest obtained for that region
